# Supplementary material for: Predicting mortality in adults with suspected infection in a Rwandan hospital: an evaluation of the adapted MEWS, qSOFA and UVA scores
Source: PubMed Central journal article supplement — BMJ Open. 2021 Feb 10;11(2):e040361. doi: 10.1136/bmjopen-2020-040361 (PMC7878147; doi:10.1136/bmjopen-2020-040361), 2021-02-10
Supplement: bmjopen-2020-040361supp001.pdf [file bmjopen-2020-040361supp001.pdf]

**Supplemental Figure 1. The study cohort.**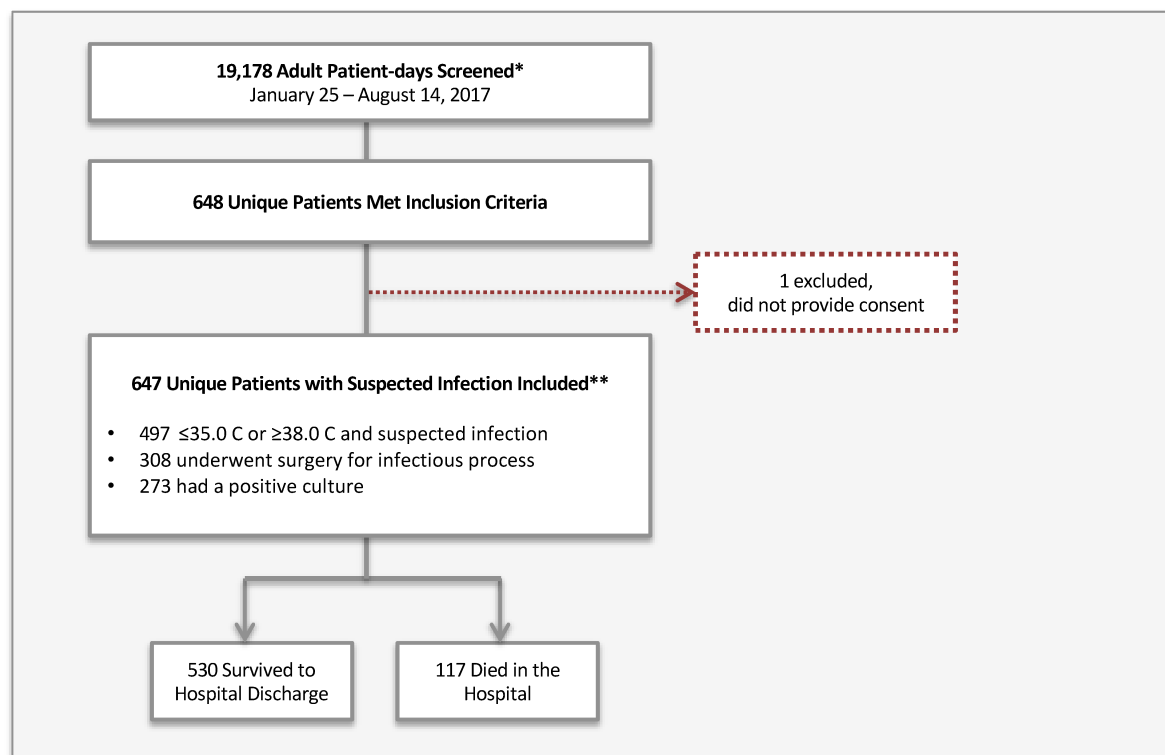

\*We screened every adult inpatient each day, and documented the number screened each day. We collected detailed data on patients included in the study with suspected infection. We did not track the number of *unique* patients screened.

\*\*Non-exclusive categories.

For patients who met more than one inclusion criteria, clinical data were recorded based on the first inclusion criteria met: at the time of fever or hypothermia, the time of surgery, or the time of culture sample collection, depending on the inclusion criteria met first for each participant.

| <b>Supplemental Table 1. Number and proportion of missing values for each variable</b>                                                                                                                                     |                          |
|----------------------------------------------------------------------------------------------------------------------------------------------------------------------------------------------------------------------------|--------------------------|
|                                                                                                                                                                                                                            | <b>Total<br/>N = 647</b> |
| <b>Variable</b>                                                                                                                                                                                                            |                          |
| Age, years                                                                                                                                                                                                                 | 7 (1.08)                 |
| Male Sex                                                                                                                                                                                                                   | 0 (0)                    |
| HIV positive                                                                                                                                                                                                               | 0 (0)                    |
| Other known pre-existing co-morbidity*                                                                                                                                                                                     | 0 (0)                    |
| Any positive bacterial culture                                                                                                                                                                                             | 0 (0)                    |
| Respiratory Rate, breaths/minute                                                                                                                                                                                           | 58 (8.96)                |
| Altered Mental Status                                                                                                                                                                                                      | 0 (0)                    |
| Systolic Blood Pressure, mmHg                                                                                                                                                                                              | 15 (2.32)                |
| Temperature, °C                                                                                                                                                                                                            | 2 (0.31)                 |
| Heart Rate, beats/minute                                                                                                                                                                                                   | 17 (2.63)                |
| Oxygen Saturation, %                                                                                                                                                                                                       | 76 (11.75)               |
| Transfer Status                                                                                                                                                                                                            | 10 (1.55)                |
| Data is reported as the frequency and proportion of missing data.<br>* Includes patients who had any of the following documented co-morbidities: diabetes, hypertension, tuberculosis, cancer, and/or severe malnutrition. |                          |

| <b>Supplemental Table 2. Predictive capacity of differing cutoffs for adapted MEWS, qSOFA and UVA scores</b>                                                                                                                                                                                                                                                                                                                                                             |                    |                    |            |            |
|--------------------------------------------------------------------------------------------------------------------------------------------------------------------------------------------------------------------------------------------------------------------------------------------------------------------------------------------------------------------------------------------------------------------------------------------------------------------------|--------------------|--------------------|------------|------------|
|                                                                                                                                                                                                                                                                                                                                                                                                                                                                          | <b>Sensitivity</b> | <b>Specificity</b> | <b>PPV</b> | <b>NPV</b> |
| <b>Adapted MEWS<sup>†</sup> Cutoff Values</b>                                                                                                                                                                                                                                                                                                                                                                                                                            |                    |                    |            |            |
| Adapted MEWS <sup>†</sup> > 0                                                                                                                                                                                                                                                                                                                                                                                                                                            | 97.44              | 1.70               | 17.95      | 75.00      |
| Adapted MEWS <sup>†</sup> > 1                                                                                                                                                                                                                                                                                                                                                                                                                                            | 94.02              | 23.96              | 21.44      | 94.78      |
| Adapted MEWS <sup>†</sup> > 2                                                                                                                                                                                                                                                                                                                                                                                                                                            | 82.91              | 43.77              | 24.56      | 92.06      |
| Adapted MEWS <sup>†</sup> > 3                                                                                                                                                                                                                                                                                                                                                                                                                                            | 65.81              | 58.87              | 26.10      | 88.64      |
| Adapted MEWS <sup>†</sup> > 4                                                                                                                                                                                                                                                                                                                                                                                                                                            | 50.43              | 74.91              | 30.73      | 87.25      |
| Adapted MEWS <sup>†</sup> > 5                                                                                                                                                                                                                                                                                                                                                                                                                                            | 34.19              | 87.36              | 37.38      | 85.74      |
| Adapted MEWS <sup>†</sup> > 6                                                                                                                                                                                                                                                                                                                                                                                                                                            | 23.08              | 94.72              | 49.09      | 84.80      |
| Adapted MEWS <sup>†</sup> > 7                                                                                                                                                                                                                                                                                                                                                                                                                                            | 9.40               | 97.92              | 50.00      | 83.04      |
| Adapted MEWS <sup>†</sup> > 8                                                                                                                                                                                                                                                                                                                                                                                                                                            | 5.13               | 99.62              | 75.00      | 82.63      |
| Adapted MEWS <sup>†</sup> > 9                                                                                                                                                                                                                                                                                                                                                                                                                                            | 1.71               | 100.00             | 100.00     | 82.17      |
| <b>qSOFA Cutoff Values</b>                                                                                                                                                                                                                                                                                                                                                                                                                                               |                    |                    |            |            |
| qSOFA ≥ 1                                                                                                                                                                                                                                                                                                                                                                                                                                                                | 70.09              | 54.72              | 25.47      | 89.23      |
| qSOFA ≥ 2                                                                                                                                                                                                                                                                                                                                                                                                                                                                | 24.79              | 90.38              | 36.25      | 84.48      |
| qSOFA ≥ 3                                                                                                                                                                                                                                                                                                                                                                                                                                                                | 4.27               | 99.81              | 83.33      | 82.53      |
| <b>UVA Cutoff Values</b>                                                                                                                                                                                                                                                                                                                                                                                                                                                 |                    |                    |            |            |
| UVA > 1                                                                                                                                                                                                                                                                                                                                                                                                                                                                  | 77.78              | 51.89              | 26.30      | 91.36      |
| UVA > 2                                                                                                                                                                                                                                                                                                                                                                                                                                                                  | 63.25              | 70.94              | 32.46      | 89.74      |
| UVA > 3                                                                                                                                                                                                                                                                                                                                                                                                                                                                  | 50.43              | 80.19              | 35.98      | 87.99      |
| UVA > 4                                                                                                                                                                                                                                                                                                                                                                                                                                                                  | 28.21              | 91.13              | 41.25      | 85.19      |
| UVA > 5                                                                                                                                                                                                                                                                                                                                                                                                                                                                  | 17.09              | 95.85              | 47.62      | 83.97      |
| UVA > 6                                                                                                                                                                                                                                                                                                                                                                                                                                                                  | 9.40               | 98.49              | 57.89      | 83.12      |
| <p><sup>†</sup>The adaption to the MEWS score pertains to the altered mental status score. In the original MEWS, 0 points were assigned for alert patients, 1 if they reacted to voice, 2 if they reacted to pain, and 3 if they were unresponsive. In our adapted MEWS, we assign 0 points for an alert patient and 2 points for a patient with any altered mental status.</p> <p>Abbreviations: PPV = positive predictive values; NPV = negative predictive value;</p> |                    |                    |            |            |

**Supplemental Figure 2.** Odds Ratios for Hospital Mortality.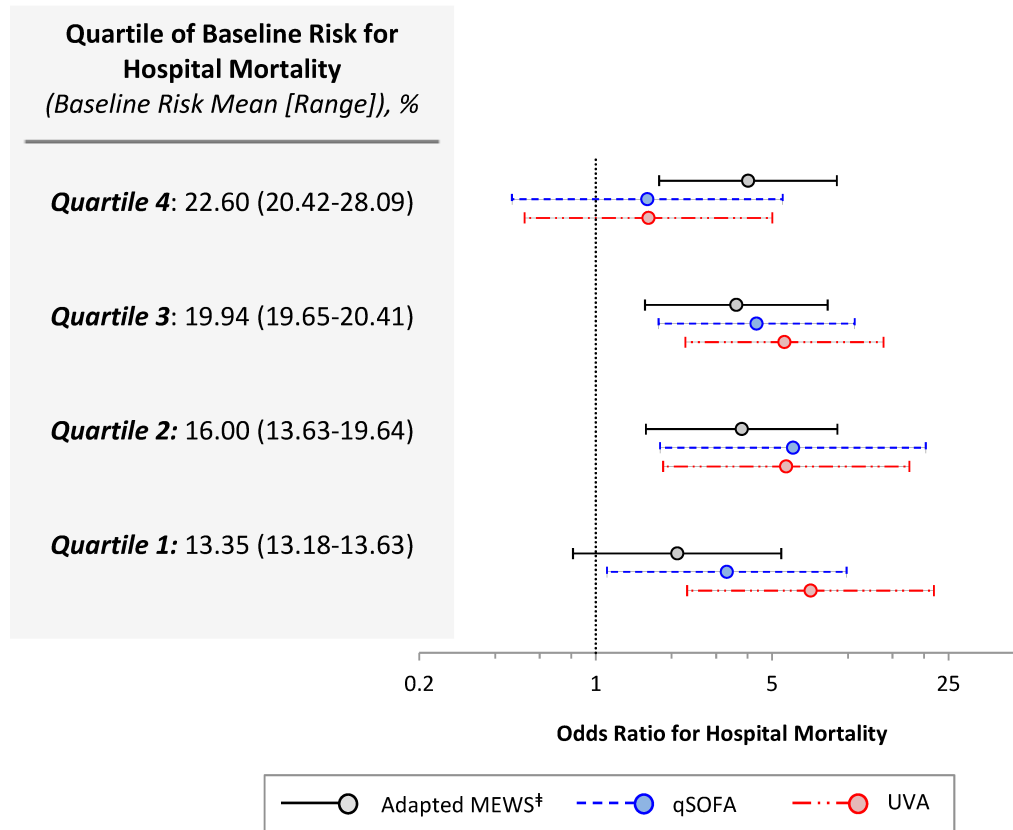

Odds ratio for hospital mortality (log-scale) comparing encounters with  $> 4$  vs  $\leq 4$  adapted MEWS,  $\geq 2$  vs  $< 2$  qSOFA points, and  $> 4$  vs  $\leq 4$  UVA, and criteria among patients with suspected infection by quartile of baseline risk for hospital mortality. Baseline risk is calculated using age, gender, HIV status and transfer status. Error bars indicate 95% CIs.

<sup>†</sup>The adaption to the MEWS score pertains to the altered mental status score. In the original MEWS, 0 points were assigned for alert patients, 1 if they reacted to voice, 2 if they reacted to pain, and 3 if they were unresponsive. In our adapted MEWS, we assign 0 points for an alert patient and 2 points for a patient with any altered mental status.

| <b>Supplemental Table 3. Model Estimates from Figure 2</b> (Receiver Operating Characteristic Curves for adapted MEWS, qSOFA, or UVA Criteria as Continuous Variables) |                                       |                       |                            |                      |         |
|------------------------------------------------------------------------------------------------------------------------------------------------------------------------|---------------------------------------|-----------------------|----------------------------|----------------------|---------|
|                                                                                                                                                                        | <b>Parameter</b>                      | <b>Standard Error</b> | <b>Odds Ratio (95% CI)</b> | <b>P-Value</b>       |         |
| <b>MODEL 1 – adapted MEWS</b>                                                                                                                                          |                                       |                       |                            |                      |         |
|                                                                                                                                                                        | Intercept                             | -2.8458               | 0.2443                     | ---                  | <0.0001 |
|                                                                                                                                                                        | MEWS ( <i>per 1 point increase</i> )  | 0.3445                | 0.0515                     | 1.411 (1.276, 1.561) | <0.0001 |
| <b>MODEL 2 - qSOFA</b>                                                                                                                                                 |                                       |                       |                            |                      |         |
|                                                                                                                                                                        | Intercept                             | -2.1088               | 0.1597                     | ---                  | <0.0001 |
|                                                                                                                                                                        | qSOFA ( <i>per 1 point increase</i> ) | 0.7891                | 0.1372                     | 2.201 (1.682, 2.880) | <0.0001 |
| <b>MODEL 3 - UVA</b>                                                                                                                                                   |                                       |                       |                            |                      |         |
|                                                                                                                                                                        | Intercept                             | -2.4477               | 0.1832                     | ---                  | <0.0001 |
|                                                                                                                                                                        | UVA ( <i>per 1 point increase</i> )   | 0.3769                | 0.0511                     | 1.458 (1.319, 1.611) | <0.0001 |

**Supplemental Figure 3.** Receiver Operating Characteristic Curves for adapted MEWS, qSOFA, or UVA Criteria Added to Baseline Risk Model for Hospital Mortality Among Patients With Suspected Infection. Baseline risk is calculated using age, gender, HIV status and transfer status.

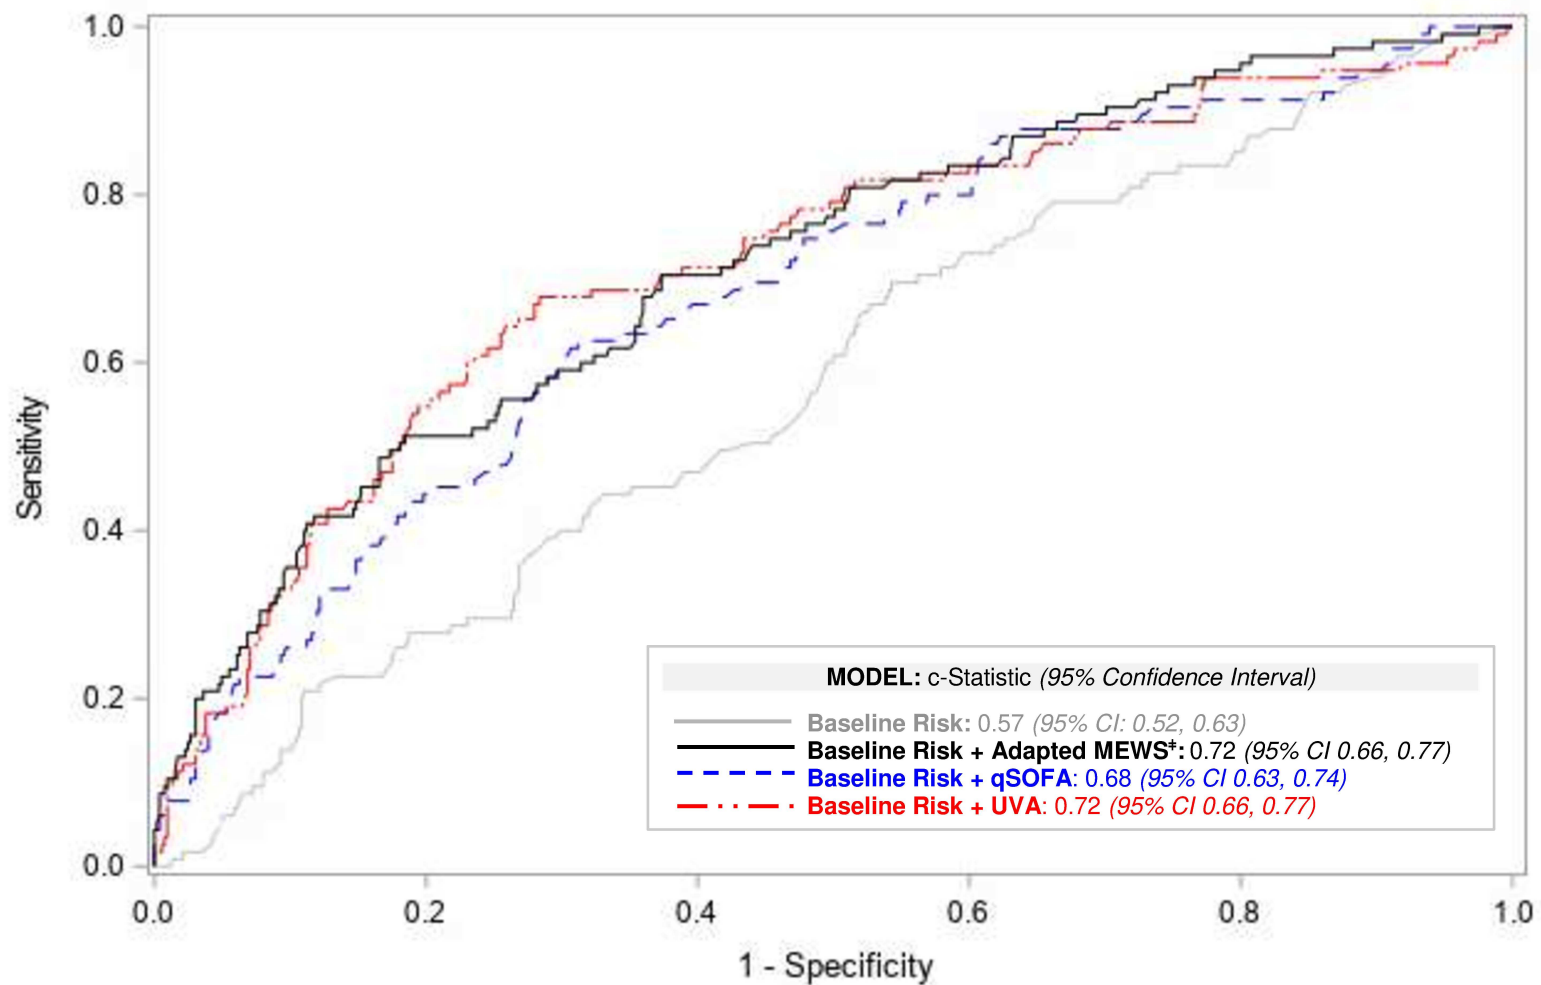

| <b>Supplemental Table 4. Model Estimates From Supplemental Figure 2 (Receiver Operating Characteristic Curves for adapted MEWS, qSOFA, or UVA Criteria as continuous variables added to Baseline Risk Model)</b> |                              |                       |                            |                      |         |
|------------------------------------------------------------------------------------------------------------------------------------------------------------------------------------------------------------------|------------------------------|-----------------------|----------------------------|----------------------|---------|
|                                                                                                                                                                                                                  | <b>Parameter</b>             | <b>Standard Error</b> | <b>Odds Ratio (95% CI)</b> | <b>P-Value</b>       |         |
| <b>MODEL 1 - baseline</b>                                                                                                                                                                                        |                              |                       |                            |                      |         |
|                                                                                                                                                                                                                  | Intercept                    | -1.4512               | 0.2946                     | ---                  | <0.0001 |
|                                                                                                                                                                                                                  | Age, per year                | 0.000945              | 0.00624                    | 1.001 (0.989, 1.013) | 0.88    |
|                                                                                                                                                                                                                  | Gender (Male vs Female)      | 0.2349                | 0.1070                     | 1.600 (1.052, 2.433) | 0.03    |
|                                                                                                                                                                                                                  | HIV (Yes vs No)              | 0.1595                | 0.1576                     | 1.376 (0.742, 2.552) | 0.31    |
|                                                                                                                                                                                                                  | Transfer (Yes vs No)         | -0.0534               | 0.1078                     | 0.899 (0.589, 1.371) | 0.62    |
| <b>MODEL 2 – adapted MEWS</b>                                                                                                                                                                                    |                              |                       |                            |                      |         |
|                                                                                                                                                                                                                  | Intercept                    | -3.1376               | 0.4087                     | ---                  | <0.0001 |
|                                                                                                                                                                                                                  | Age, per year                | 0.00506               | 0.00664                    | 1.005 (0.992, 1.018) | 0.45    |
|                                                                                                                                                                                                                  | Gender (Male vs Female)      | 0.2819                | 0.1127                     | 1.757 (1.130, 2.734) | 0.01    |
|                                                                                                                                                                                                                  | HIV (Yes vs No)              | 0.0696                | 0.1667                     | 1.149 (0.598, 2.210) | 0.68    |
|                                                                                                                                                                                                                  | Transfer (Yes vs No)         | -0.1503               | 0.1147                     | 0.740 (0.472, 1.160) | 0.19    |
|                                                                                                                                                                                                                  | MEWS (per 1 point increase)  | 0.3797                | 0.0537                     | 1.462 (1.316, 1.624) | <0.0001 |
| <b>MODEL 3 - qSOFA</b>                                                                                                                                                                                           |                              |                       |                            |                      |         |
|                                                                                                                                                                                                                  | Intercept                    | -2.1031               | 0.3311                     | ---                  | <.0001  |
|                                                                                                                                                                                                                  | Age, per year                | 0.00131               | 0.00647                    | 1.001 (0.989, 1.014) | 0.84    |
|                                                                                                                                                                                                                  | Gender (Male vs Female)      | 0.2440                | 0.1105                     | 1.629 (1.056, 2.513) | 0.03    |
|                                                                                                                                                                                                                  | HIV (Yes vs No)              | 0.1264                | 0.1630                     | 1.288 (0.680, 2.439) | 0.44    |
|                                                                                                                                                                                                                  | Transfer (Yes vs No)         | -0.1345               | 0.1127                     | 0.764 (0.491, 1.188) | 0.23    |
|                                                                                                                                                                                                                  | qSOFA (per 1 point increase) | 0.8381                | 0.1412                     | 2.312 (1.753, 3.049) | <0.0001 |
| <b>MODEL 4 - UVA</b>                                                                                                                                                                                             |                              |                       |                            |                      |         |
|                                                                                                                                                                                                                  | Intercept                    | -2.4523               | 0.3442                     | ---                  | <0.0001 |
|                                                                                                                                                                                                                  | Age, per year                | -0.00074              | 0.00658                    | 0.999 (0.986, 1.012) | 0.91    |
|                                                                                                                                                                                                                  | Gender (Male vs Female)      | 0.1395                | 0.1128                     | 1.322 (0.849, 2.057) | 0.22    |
|                                                                                                                                                                                                                  | HIV (Yes vs No)              | -0.0493               | 0.1655                     | 0.906 (0.474, 1.733) | 0.77    |
|                                                                                                                                                                                                                  | Transfer (Yes vs No)         | -0.0988               | 0.1142                     | 0.821 (0.525, 1.284) | 0.39    |
|                                                                                                                                                                                                                  | UVA (per 1 point increase)   | 0.3776                | 0.0524                     | 1.459 (1.316, 1.617) | <0.0001 |
